# Supplementary material
Source: PubMed Central journal article supplement (PMC2395058)
Supplement: supp_190_11_3886__1.pdf [file supp_190_11_3886__1.pdf]

## SUPPLEMENTARY INFORMATION

**TABLE S1.** Strains and plasmids used in this study

| Name                  | Description                                                                                                                                                                                                        | Reference/source                               |
|-----------------------|--------------------------------------------------------------------------------------------------------------------------------------------------------------------------------------------------------------------|------------------------------------------------|
| <i>Strains</i>        |                                                                                                                                                                                                                    |                                                |
| H37Rv                 | Virulent reference laboratory strain; ATCC 25618                                                                                                                                                                   | London School of Hygiene and Tropical Medicine |
| $\Delta mutAB$        | <i>mutAB</i> deletion mutant of H37Rv, lacking 2342 bp internal <i>AscI</i> / <i>BglIII</i> fragment                                                                                                               | This study                                     |
| $\Delta prpDC$        | <i>prpDC</i> deletion mutant of H37Rv, lacking the 2660 bp region from the start codon of <i>prpD</i> to the stop codon of <i>prpC</i> (2)                                                                         | This study                                     |
| $\Delta mutAB::mutAB$ | Reversion mutant of $\Delta mutAB$ in which the wild type <i>mutAB</i> allele was restored by knock-in mutagenesis                                                                                                 | This study                                     |
| $\Delta prpDC::prpDC$ | <i>prpDC</i> mutant carrying a 3115 bp gene region containing the <i>prpDC</i> locus in pPRPDC (2) integrated at the <i>attB</i> locus; Km <sup>R</sup>                                                            | This study                                     |
| <i>Plasmids</i>       |                                                                                                                                                                                                                    |                                                |
| p2NIL                 | Cloning vector; Km <sup>R</sup>                                                                                                                                                                                    | (3)                                            |
| pGOAL17               | Plasmid carrying <i>lacZ</i> and <i>sacB</i> genes as a <i>PacI</i> cassette; Ap <sup>R</sup>                                                                                                                      | (3)                                            |
| p2 <i>mutAB</i>       | p2NIL carrying 7760 bp <i>EcoRI</i> fragment excised from the H37Rv cosmid Rv58 (1) and containing the <i>mutAB</i> genes plus 1431 bp of 3'- and 2228 bp of 5'-flanking chromosomal sequence; Km <sup>R</sup>     | This study                                     |
| p2 $\Delta mutAB$     | p2NIL carrying $\Delta mutAB$ allele generated by digestion of p2 <i>mutAB</i> with <i>AscI</i> and <i>BglIII</i> and re-ligation to eliminate 2342 bp of sequence within the <i>mutAB</i> region; Km <sup>R</sup> | This study                                     |
| p2 $\Delta mutAB17$   | $\Delta mutAB$ knockout vector – p2 $\Delta mutAB$ containing <i>PacI</i> cassette from pGOAL17; Km <sup>R</sup> Suc <sup>S</sup>                                                                                  | This study                                     |
| p2 <i>mutAB17</i>     | <i>mutAB</i> knock-in vector – p2 <i>mutAB</i> containing <i>PacI</i> cassette from pGOAL17; Km <sup>R</sup> Suc <sup>S</sup>                                                                                      | This study                                     |
| pAU100                | pJG1111 carrying $\Delta prpDC$ allele – fusion of 1kb PCR products upstream and downstream of <i>prpDC</i> eliminating 2660bp <i>prpDC</i> coding sequence; Km <sup>R</sup> Hyg <sup>R</sup>                      | (2)                                            |
| pPRPDC                | pMV306 (4) carrying a 3115 bp <i>EcoRI</i> / <i>NcoI</i> fragment containing <i>prpDC</i> ; Km <sup>R</sup>                                                                                                        | (2)                                            |

**TABLE S2.** Oligonucleotides used in this study

| <b>Name</b> | <b>Sequence (5'-3')<sup>a</sup></b> | <b>Application</b>                                                                                                                                           | <b>Properties</b>                                                                                                       |
|-------------|-------------------------------------|--------------------------------------------------------------------------------------------------------------------------------------------------------------|-------------------------------------------------------------------------------------------------------------------------|
| MutA-F      | <i>GGGGTACCGAAGCAAGCCCAAGCA</i>     | Forward primer used for PCR genotyping of <i>mutAB</i> and $\Delta$ <i>mutAB</i> alleles                                                                     | 2084 bp amplicon generated from the wild type <i>mutAB</i> allele using MutA-F and MutA-R primers                       |
| MutA-R      | <i>GGACTAGTCAATGCCTTCCGGCGT</i>     | Reverse primer used for PCR-based genotyping of the <i>mutAB</i> allele                                                                                      |                                                                                                                         |
| MutB-R      | <i>GGAAGCTTGCAGGCGCTGGCGA</i>       | Reverse primer used for PCR-based genotyping of the $\Delta$ <i>mutAB</i> allele                                                                             | 1933 bp amplicon generated from the $\Delta$ <i>mutAB</i> allele using MutA-F and MutB-R primers                        |
| MutAB-F     | AGA TCCGTACCATTTCCGGG               | Forward and reverse primer pair used to generate the DNA probe used for genotypic confirmation of the $\Delta$ <i>mutAB</i> mutant by Southern blot analysis | 904 bp amplicon spanning from the 3'-end of <i>mutB</i> to within Rv1495 (see Fig. S1 in the Supplementary Information) |
| MutAB-R     | TTG TTGGAGACGATGAGCCA               |                                                                                                                                                              |                                                                                                                         |
| PrpDC-F     | <i>GGGGGCTGCTCTGCGGCACGGTG</i>      | Forward primer used for PCR-based genotyping of the <i>prpDC</i> and $\Delta$ <i>prpDC</i> alleles                                                           | 1073 bp amplicon generated from wild type <i>prpDC</i> allele using PrpDC-F and PrpDC-R                                 |
| PrpDC-R     | <i>GGGGGATCTTGTAGGCCATGTGCTC</i>    | Reverse primer used for PCR genotyping of <i>prpDC</i> allele                                                                                                |                                                                                                                         |
| PrpDC-R2    | <i>GGGGGTACAACAGGATCTTGGCGAC</i>    | Reverse primer used for PCR genotyping of $\Delta$ <i>prpDC</i> allele.                                                                                      | 1195bp amplicon from $\Delta$ <i>prpDC</i> allele using PrpDC-F and PrpDC-R2                                            |

a. GC-clamp sequences (non-H37Rv) are italicized.

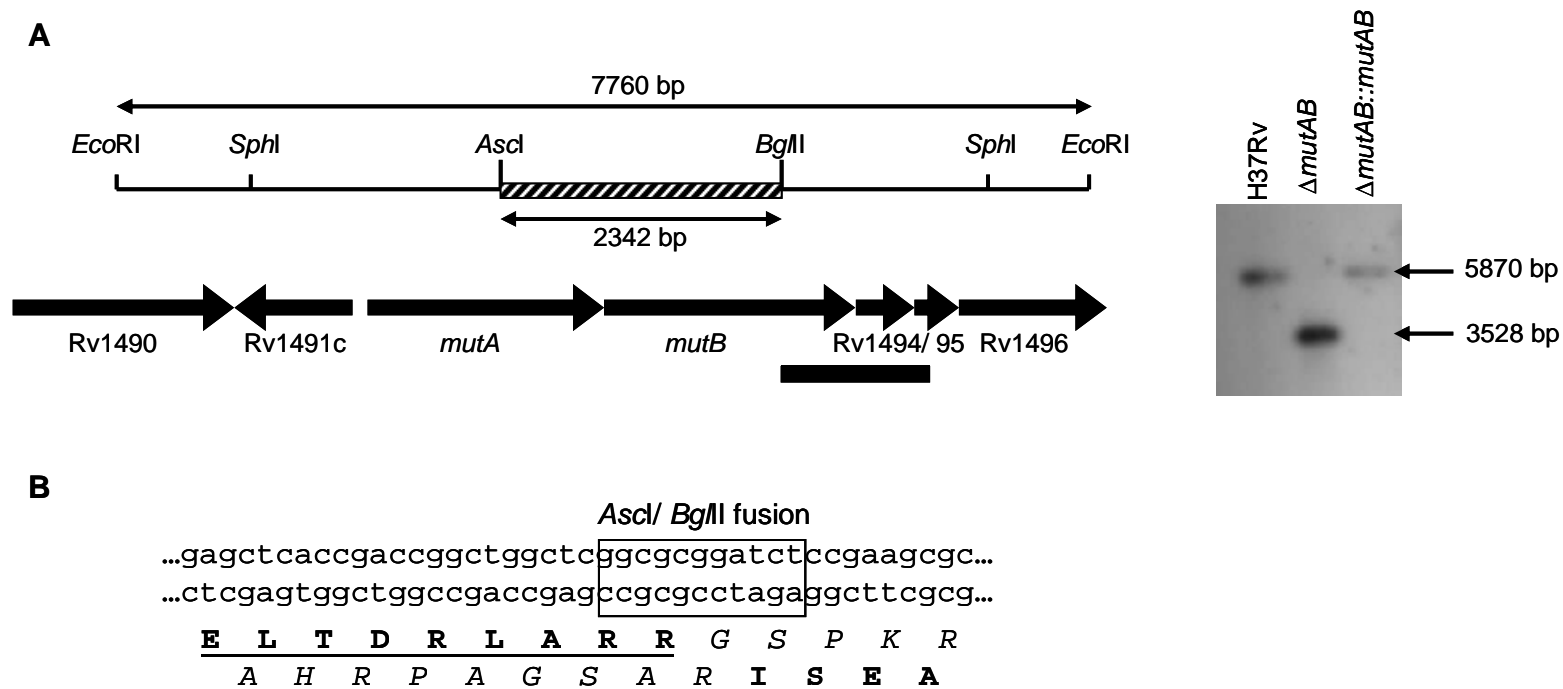

FIG. S1. Construction and genotypic characterization of the  $\Delta mutAB$  mutant of MTB H37Rv and its reverted (knock-in) derivative ( $\Delta mutAB::mutAB$ ). **A.** The *mutAB* and flanking genes are shown as solid arrows (not to scale). The line drawing above shows the 2342-bp segment internal to *mutAB* that was deleted in the  $\Delta mutAB$  mutant strain (hatched box). For the Southern blot analysis (right), genomic DNA from the wild type,  $\Delta mutAB$  and reverted ( $\Delta mutAB::mutAB$ ) strains was digested with *SphI* which cuts on either side of the deleted region to produce a 5870-bp fragment from H37Rv and  $\Delta mutAB::mutAB$  and a 3528-bp fragment from  $\Delta mutAB$  which were detected using the PCR-generated probe denoted by a grey box. **B.** Sequence at the junction between the truncated *mutA* and *mutB* genes in the  $\Delta mutAB$  mutation. The DNA sequence is shown in lowercase and the fusion between the *AscI* and *BglII* sites is boxed. The encoded amino acid sequences are shown in uppercase. The first (top) reading frame shows the sequence of MutA (bold underlined), which terminates within the junction site at Arg402. The third reading frame (bottom) shows the sequence of MutB (bold underlined) which starts from Ile567 within the junction site. Spurious fused sequences are shown in uppercase italics.

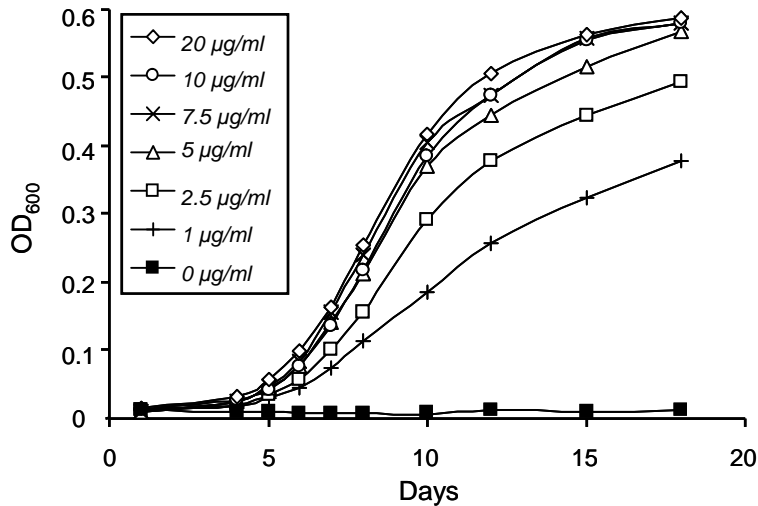

FIG. S2. Effect of vitamin B<sub>12</sub> (cyanocobalamin) concentration on growth of the  $\Delta prpDC$  mutant on propionate

## References

1. **Brosch, R., S. V. Gordon, A. Billault, T. Garnier, K. Eiglmeier, C. Soravito, B. G. Barrell, and S. T. Cole.** 1998. Use of a *Mycobacterium tuberculosis* H37Rv bacterial artificial chromosome library for genome mapping, sequencing, and comparative genomics. *Infect. Immun.* **66**:2221-2229.
2. **Muñoz-Elías, E. J., A. M. Upton, J. Cherian, and J. D. McKinney.** 2006. Role of the methylcitrate cycle in *Mycobacterium tuberculosis* metabolism, intracellular growth, and virulence. *Mol. Microbiol.* **60**:1109-1122.
3. **Parish, T., and N. G. Stoker.** 2000. Use of a flexible cassette method to generate a double unmarked *Mycobacterium tuberculosis* *tlyA plcABC* mutant by gene replacement. *Microbiology* **146**:1969-1975.
4. **Stover, C. K., V. F. de la Cruz, T. R. Fuerst, J. E. Burlein, L. A. Benson, L. T. Bennett, G. P. Bansal, J. F. Young, M. H. Lee, G. F. Hatfull, S. B. Snapper, R. B. Barletta, W. R. Jacobs, Jr., and B. R. Bloom.** 1991. New use of BCG for recombinant vaccines. *Nature* **351**:456-460.
